# Supplementary material for: A Study of Urban Haze and Its Association with Cold Surge and Sea Breeze for Greater Bangkok
Source: MDPI journal article supplement (doi:10.3390/ijerph20043482), 2023-02-16
Supplement: s1 [file s1]

# A Study of Urban Haze and Its Association with Cold Surge and Sea Breeze for Greater Bangkok (Supplementary Materials)

**Table S1.** List of the identified haze episodes and their corresponding types.

| Episode | Period                  | Type | Duration (days) |
|---------|-------------------------|------|-----------------|
| 01      | 07/12/2016 – 14/12/2016 | I    | 8               |
| 02      | 18/12/2016 – 21/12/2016 | III  | 4               |
| 03      | 25/12/2016 – 26/12/2016 | II   | 2               |
| 04      | 29/12/2016              | IV   | 1               |
| 05      | 07/01/2017              | IV   | 1               |
| 06      | 15/01/2017              | II   | 1               |
| 07      | 25/01/2017              | IV   | 1               |
| 08      | 29/01/2017 – 02/02/2017 | II   | 5               |
| 09      | 05/02/2017 – 07/02/2017 | II   | 3               |
| 10      | 10/02/2017 – 19/02/2017 | III  | 10              |
| 11      | 28/02/2017              | IV   | 1               |
| 12      | 10/12/2017 – 11/12/2017 | II   | 2               |
| 13      | 19/12/2017 – 26/12/2017 | I    | 8               |
| 14      | 04/01/2018 – 05/01/2018 | II   | 2               |
| 15      | 12/01/2018 – 24/01/2018 | III  | 13              |
| 16      | 02/02/2018 – 15/02/2018 | III  | 14              |
| 17      | 01/12/2018              | IV   | 1               |
| 18      | 19/12/2018 – 28/12/2018 | III  | 10              |
| 19      | 06/01/2019 – 07/01/2019 | III  | 2               |
| 20      | 11/01/2019 – 14/01/2019 | II   | 4               |
| 21      | 19/01/2019 – 31/01/2019 | III  | 13              |
| 22      | 13/02/2019              | II   | 1               |
| 23      | 10/12/2019 – 15/12/2019 | I    | 6               |
| 24      | 06/01/2020 – 10/01/2020 | II   | 5               |
| 25      | 18/01/2020 – 20/01/2020 | IV   | 3               |
| 26      | 01/02/2020 – 03/02/2020 | II   | 3               |
| 27      | 19/02/2020 – 25/02/2020 | I    | 7               |
| 28      | 10/12/2020 – 15/12/2020 | III  | 6               |
| 29      | 06/01/2021              | II   | 1               |
| 30      | 13/01/2021 – 23/01/2021 | III  | 11              |
| 31      | 01/02/2021 – 07/02/2021 | II   | 7               |
| 32      | 21/02/2021              | IV   | 1               |
| 33      | 26/02/2021 – 27/02/2021 | II   | 2               |
| 34      | 15/12/2021 – 16/12/2021 | III  | 2               |
| 35      | 21/12/2021 – 24/12/2021 | III  | 4               |
| 36      | 07/01/2022              | IV   | 1               |
| 37      | 07/02/2022 – 08/02/2022 | II   | 2               |
| 38      | 28/02/2022              | II   | 1               |

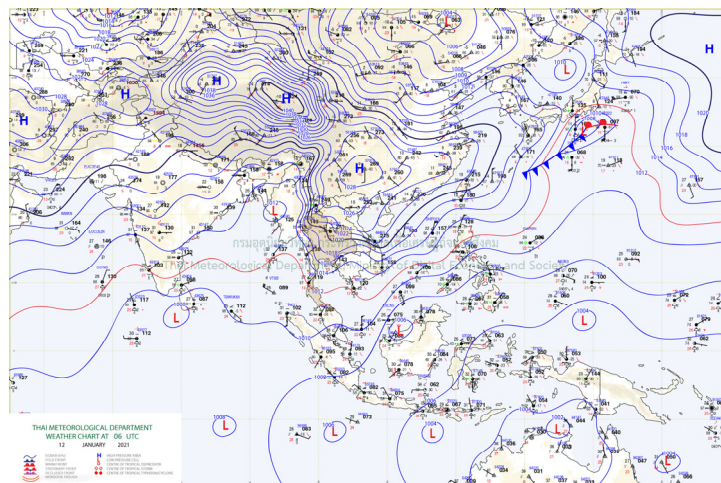

(a)

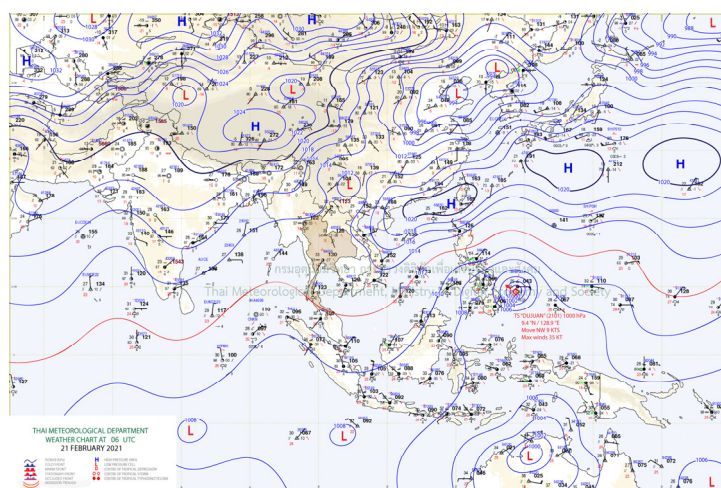

(b)

**Figure S1:** Example of representative synoptic charts for (a) Days with cold surge; (b) Days without cold surge, with focus on GBK and the central region of Thailand.
